# Supplementary material for: Influenza vaccination coverage in pediatric population in Italy: an analysis of recent trends
Source: Springer Nature journal article supplement (doi:10.1186/s13052-022-01271-0), 2022-05-16

**Figure S1.** Annual influenza-like illness (ILI) cases per 100,000 in children in Italy by age group.

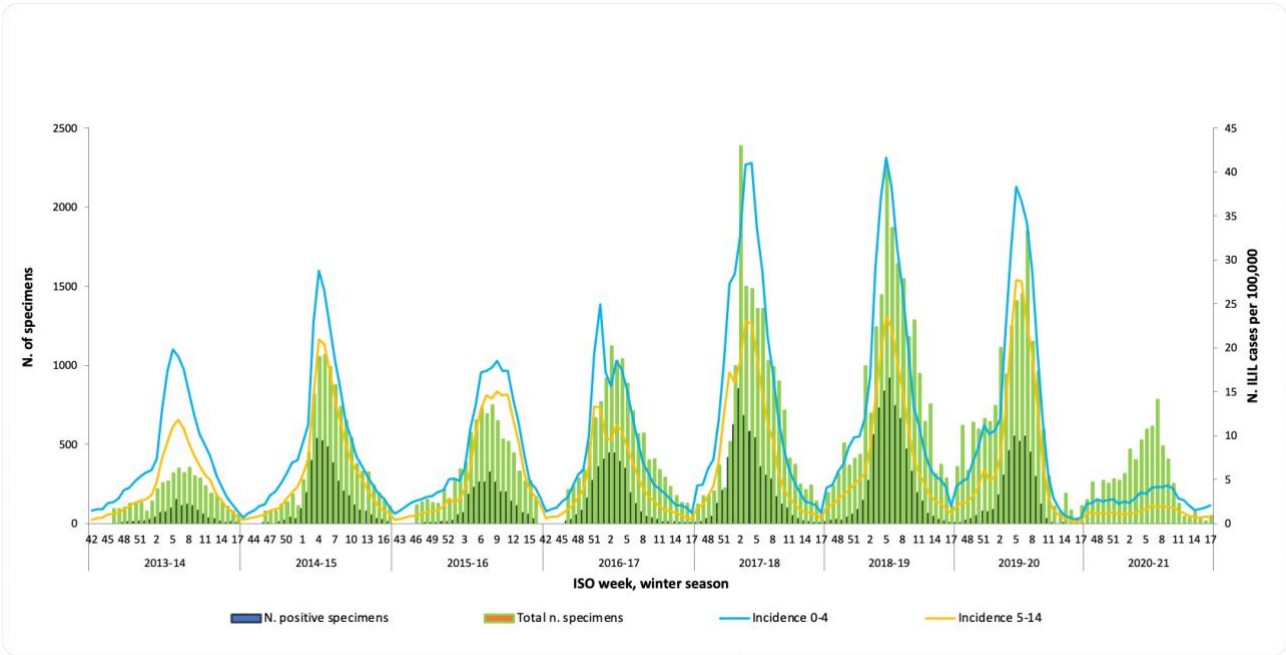

Supplement: MOESM1 [file 20417946]
