# Supplementary material for: Influenza vaccination coverage in pediatric population in Italy: an analysis of recent trends
Source: Springer Nature journal article supplement (doi:10.1186/s13052-022-01271-0), 2022-05-16
Supplement: MOESM2 [file 20417946]

**Table S1.** Regional sources relating to the implementation of the Circular of the Italian Ministry of Health 2020/21 “Influenza prevention and control: recommendations for the 2021-2022 season”.

| <b>Region</b>         | <b>Source</b>                                                                                                                                                                                                                                                                                                                                                                                                                                                                                                                                                                                                                                                                                                               |
|-----------------------|-----------------------------------------------------------------------------------------------------------------------------------------------------------------------------------------------------------------------------------------------------------------------------------------------------------------------------------------------------------------------------------------------------------------------------------------------------------------------------------------------------------------------------------------------------------------------------------------------------------------------------------------------------------------------------------------------------------------------------|
| Piedmont              | <a href="https://www.regione.piemonte.it/web/temi/sanita/stagione-influenzale-2020-2021">https://www.regione.piemonte.it/web/temi/sanita/stagione-influenzale-2020-2021</a>                                                                                                                                                                                                                                                                                                                                                                                                                                                                                                                                                 |
| Valle d’Aosta         | <a href="http://www.ausl.vda.it/notizie.asp?id=778&amp;l=1&amp;n=1247">http://www.ausl.vda.it/notizie.asp?id=778&amp;l=1&amp;n=1247</a>                                                                                                                                                                                                                                                                                                                                                                                                                                                                                                                                                                                     |
| Liguria               | <a href="http://www.asl3.liguria.it/campagna-antinfluenzale-2020-2021.html">http://www.asl3.liguria.it/campagna-antinfluenzale-2020-2021.html</a>                                                                                                                                                                                                                                                                                                                                                                                                                                                                                                                                                                           |
| Lombardy              | <a href="https://www.wikivaccini.regione.lombardia.it/wps/portal/site/wikivaccini/DettaglioRedazionale/le-vaccinazioni-quali/campagna-2020-2021">https://www.wikivaccini.regione.lombardia.it/wps/portal/site/wikivaccini/DettaglioRedazionale/le-vaccinazioni-quali/campagna-2020-2021</a>                                                                                                                                                                                                                                                                                                                                                                                                                                 |
| Trento                | <a href="https://www.ufficiostampa.provincia.tn.it/Comunicati/Influenza-iomivaccino-al-via-la-campagna-di-vaccinazione">https://www.ufficiostampa.provincia.tn.it/Comunicati/Influenza-iomivaccino-al-via-la-campagna-di-vaccinazione</a>                                                                                                                                                                                                                                                                                                                                                                                                                                                                                   |
| Bolzano               | <a href="https://www.provincia.bz.it/news/it/news.asp?news_action=4&amp;news_article_id=644310">https://www.provincia.bz.it/news/it/news.asp?news_action=4&amp;news_article_id=644310</a>                                                                                                                                                                                                                                                                                                                                                                                                                                                                                                                                   |
| Veneto                | <a href="https://www.aulss3.veneto.it/Campagna-antinfluenzale">https://www.aulss3.veneto.it/Campagna-antinfluenzale</a>                                                                                                                                                                                                                                                                                                                                                                                                                                                                                                                                                                                                     |
| Friuli Venezia Giulia | <a href="https://www.regione.fvg.it/rafvfg/cms/RAFVG/salute-sociale/promozione-salute-prevenzione/FOGLIA33/">https://www.regione.fvg.it/rafvfg/cms/RAFVG/salute-sociale/promozione-salute-prevenzione/FOGLIA33/</a>                                                                                                                                                                                                                                                                                                                                                                                                                                                                                                         |
| Emilia-Romagna        | <a href="https://www.regione.emilia-romagna.it/notizie/2020/ottobre/ancor-piu-prevenzione-covid-in-emilia-romagna-test-sierologici-gratuiti-in-farmacia-per-studenti-genitori-e-familiari-universitari/campagnadivaccinazioneantinflu.pdf">https://www.regione.emilia-romagna.it/notizie/2020/ottobre/ancor-piu-prevenzione-covid-in-emilia-romagna-test-sierologici-gratuiti-in-farmacia-per-studenti-genitori-e-familiari-universitari/campagnadivaccinazioneantinflu.pdf</a>                                                                                                                                                                                                                                             |
| Tuscany               | <a href="https://www.vaccinarsintoscana.org/notizie/2020/10/vaccinarsi-contro-linfluenza-al-via-la-campagna-vaccinale-della-regione-toscana">https://www.vaccinarsintoscana.org/notizie/2020/10/vaccinarsi-contro-linfluenza-al-via-la-campagna-vaccinale-della-regione-toscana</a>                                                                                                                                                                                                                                                                                                                                                                                                                                         |
| Umbria                | <a href="https://www.regione.umbria.it/documents/18/24838485/Linee+di+indirizzo+++vaccinazione+antinfluenzale+e+++antipneumococco_+2020-2021.pdf/a0ef29c2-8dba-4b46-83e8-a3a1cf1913ea">https://www.regione.umbria.it/documents/18/24838485/Linee+di+indirizzo+++vaccinazione+antinfluenzale+e+++antipneumococco_+2020-2021.pdf/a0ef29c2-8dba-4b46-83e8-a3a1cf1913ea</a>                                                                                                                                                                                                                                                                                                                                                     |
| Marche                | <a href="https://www.vaccinarsinellemarche.org/vaccinazioni-marche/campagne-vaccinali-delle-marche/campagna-antinfluenzale-2020-2021">https://www.vaccinarsinellemarche.org/vaccinazioni-marche/campagne-vaccinali-delle-marche/campagna-antinfluenzale-2020-2021</a>                                                                                                                                                                                                                                                                                                                                                                                                                                                       |
| Lazio                 | <a href="https://www.salutelazio.it/vaccinazione-antinfluenzale-2020/21">https://www.salutelazio.it/vaccinazione-antinfluenzale-2020/21</a>                                                                                                                                                                                                                                                                                                                                                                                                                                                                                                                                                                                 |
| Abruzzo               | <a href="https://www.vaccinoantinfluenzaleabruzzo.it">https://www.vaccinoantinfluenzaleabruzzo.it</a>                                                                                                                                                                                                                                                                                                                                                                                                                                                                                                                                                                                                                       |
| Molise                | <a href="http://www3.regione.molise.it/flex/cm/pages/ServeBLOB.php/L/IT/IDPagina/17572">http://www3.regione.molise.it/flex/cm/pages/ServeBLOB.php/L/IT/IDPagina/17572</a>                                                                                                                                                                                                                                                                                                                                                                                                                                                                                                                                                   |
| Campania              | <a href="http://www.aiopcampaia.it/public/normativa/7906b2ba132b4ef3a36cdfef6fddec277.pdf">http://www.aiopcampaia.it/public/normativa/7906b2ba132b4ef3a36cdfef6fddec277.pdf</a>                                                                                                                                                                                                                                                                                                                                                                                                                                                                                                                                             |
| Apulia                | <a href="https://www.vaccinarsinapulia.org/notizie/2020/07/antinfluenzale-stagione-2020/21.-raccomandazioni-ufficiali,-documento-del-nitag-e-appello-degli-igienisti">https://www.vaccinarsinapulia.org/notizie/2020/07/antinfluenzale-stagione-2020/21.-raccomandazioni-ufficiali,-documento-del-nitag-e-appello-degli-igienisti</a><br><a href="http://www.quotidianosanita.it/scienza-e-farmaci/articolo.php?articolo_id=87169">http://www.quotidianosanita.it/scienza-e-farmaci/articolo.php?articolo_id=87169</a><br><a href="https://press.regione.apulia.it/-/avvio-campagna-di-vaccinazione-antinfluenzale-2020-2021">https://press.regione.apulia.it/-/avvio-campagna-di-vaccinazione-antinfluenzale-2020-2021</a> |
| Basilicata            | <a href="https://www.aspbasilicata.it/wp-content/uploads/DDG513_2020.pdf">https://www.aspbasilicata.it/wp-content/uploads/DDG513_2020.pdf</a><br><a href="https://www.lagazzettadelmezzogiorno.it/news/potenza/1253004/basilicata-una-colletta-per-avere-il-vaccino-contro-l-influenza.html">https://www.lagazzettadelmezzogiorno.it/news/potenza/1253004/basilicata-una-colletta-per-avere-il-vaccino-contro-l-influenza.html</a>                                                                                                                                                                                                                                                                                          |
| Calabria              | <a href="https://portale.regione.calabria.it/website/portalmidia/decreti/2020-05/Ordinanza%20P.G.R.%20n.%2047_2020.pdf">https://portale.regione.calabria.it/website/portalmidia/decreti/2020-05/Ordinanza%20P.G.R.%20n.%2047_2020.pdf</a>                                                                                                                                                                                                                                                                                                                                                                                                                                                                                   |
| Sicily                | <a href="https://www.vaccinarsinsicilia.org/notizie/2020/08/tante-novit%C3%A0-della-campagna-vaccinale-antinfluenzale-2020/21#:~:text=Per%20tutte%20le%20ragioni%20sopraccitate,rispetto%20alla%20stagione%202019%2F2020">https://www.vaccinarsinsicilia.org/notizie/2020/08/tante-novit%C3%A0-della-campagna-vaccinale-antinfluenzale-2020/21#:~:text=Per%20tutte%20le%20ragioni%20sopraccitate,rispetto%20alla%20stagione%202019%2F2020</a>                                                                                                                                                                                                                                                                               |
| Sardinia              | <a href="https://www.aslcagliari.it/index.php?xsl=7&amp;s=70944&amp;v=2&amp;c=288">https://www.aslcagliari.it/index.php?xsl=7&amp;s=70944&amp;v=2&amp;c=288</a><br><a href="https://www.vaccinarsinsardegna.org/it/notizie/2020/07/vaccinazione-anti-influenzale-2020-novit%C3%A0">https://www.vaccinarsinsardegna.org/it/notizie/2020/07/vaccinazione-anti-influenzale-2020-novit%C3%A0</a>                                                                                                                                                                                                                                                                                                                                |
